# Supplementary material for: Ecology of West Nile Virus in the Danube Delta, Romania: Phylogeography, Xenosurveillance and Mosquito Host-Feeding Patterns
Source: MDPI journal article supplement (doi:10.3390/v11121159), 2019-12-14
Supplement: s1 [file s1]

**Table S5.** Results of Chi-square tests for the comparison of host-feeding groups of mosquitoes between the four sampling sites in the DDBR, Romania (2014-2016) with adjusted p-values.

| Sampling site | Sampling site | adjusted p value | $\chi^2$   |
|---------------|---------------|------------------|------------|
| Dunărea Veche | Lake Roşuleţ  | 0.06759567       | 8.97194151 |
| Dunărea Veche | Letea         | 6.31E-14         | 64.3731036 |
| Dunărea Veche | Sulina        | 0.00866489       | 13.0804717 |
| Lake Roşuleţ  | Letea         | 1.09E-19         | 90.9134496 |
| Lake Roşuleţ  | Sulina        | 0.00058796       | 18.4612242 |
| Letea         | Sulina        | 0.00932428       | 12.9337851 |
