# Supplementary material for: Ecology of West Nile Virus in the Danube Delta, Romania: Phylogeography, Xenosurveillance and Mosquito Host-Feeding Patterns
Source: MDPI journal article supplement (doi:10.3390/v11121159), 2019-12-14
Supplement: s1 [file s1]

**Table S4.** Results of Chi-square tests for the comparison of host-feeding groups between the six most abundant mosquito species with adjusted p-values collected at four sampling sites in the DDBR, Romania (2014-2016).

| <b>Mosquito species</b>            | <b>Mosquito species</b>              | <b>adjusted p value</b> | <b><math>\chi^2</math></b> |
|------------------------------------|--------------------------------------|-------------------------|----------------------------|
| <i>Aedes caspius</i>               | <i>Aedes vexans</i>                  | 0.036648349             | 12.0288742                 |
| <i>Aedes caspius</i>               | <i>Anopheles hyrcanus</i>            | 1                       | 0.876218151                |
| <i>Aedes caspius</i>               | <i>Anopheles maculipennis</i> s.l.   | 1                       | 1.050654796                |
| <i>Aedes caspius</i>               | <i>Coquillettidia richiardii</i>     | 0.5154945               | 6.741357691                |
| <i>Aedes caspius</i>               | <i>Culex pipiens</i> s.l./torrentium | 1.88E-07                | 36.3867405                 |
| <i>Aedes vexans</i>                | <i>Anopheles hyrcanus</i>            | 9.19E-06                | 28.61119323                |
| <i>Aedes vexans</i>                | <i>Anopheles maculipennis</i> s.l.   | 0.00018112              | 22.64880073                |
| <i>Aedes vexans</i>                | <i>Coquillettidia richiardii</i>     | 0.227764729             | 8.374984545                |
| <i>Aedes vexans</i>                | <i>Culex pipiens</i> s.l./torrentium | 1.80E-18                | 87.13728235                |
| <i>Anopheles hyrcanus</i>          | <i>Anopheles maculipennis</i> s.l.   | 1                       | 3.276589246                |
| <i>Anopheles hyrcanus</i>          | <i>Coquillettidia richiardii</i>     | 8.18E-09                | 42.65875941                |
| <i>Anopheles hyrcanus</i>          | <i>Culex pipiens</i> s.l./torrentium | 2.16E-31                | 146.6318183                |
| <i>Anopheles maculipennis</i> s.l. | <i>Coquillettidia richiardii</i>     | 0.006237562             | 15.57043205                |
| <i>Anopheles maculipennis</i> s.l. | <i>Culex pipiens</i> s.l./torrentium | 2.48E-12                | 58.85872968                |
| <i>Coquillettidia richiardii</i>   | <i>Culex pipiens</i> s.l./torrentium | 3.07E-23                | 109.094442                 |
