# Supplementary material for: Ecology of West Nile Virus in the Danube Delta, Romania: Phylogeography, Xenosurveillance and Mosquito Host-Feeding Patterns
Source: MDPI journal article supplement (doi:10.3390/v11121159), 2019-12-14
Supplement: s1 [file s1]

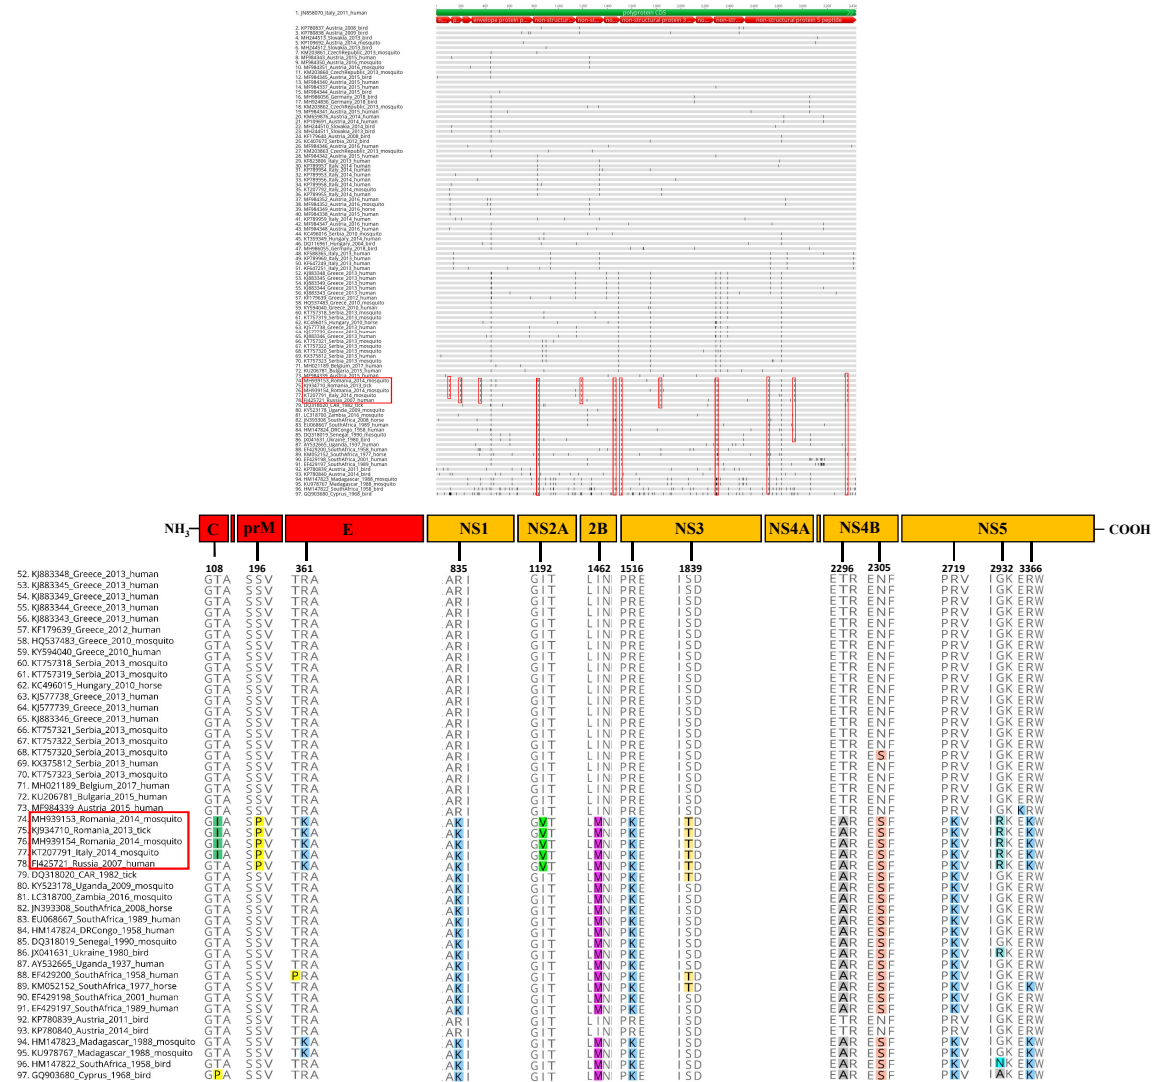

**Figure S2.** Schematic representation of the specific amino acid replacements in the Danube Delta WNV genomes. A number indicating the position of amino acid mutations in the gene and the single-letter amino acid codes are used to denote the EEC1 clade specific mutations and those involved in the convergent evolution along the polyprotein genes.
