# Supplementary material for: Ecology of West Nile Virus in the Danube Delta, Romania: Phylogeography, Xenosurveillance and Mosquito Host-Feeding Patterns
Source: MDPI journal article supplement (doi:10.3390/v11121159), 2019-12-14
Supplement: s1 [file s1]

**Table S1.** Frequency and percentage of mosquitoes collected at four sampling sites in the DDBR, Romania (2014-2016).

| <b>Mosquito species</b>                      | <b>Sum</b> | <b>Percentage</b> |
|----------------------------------------------|------------|-------------------|
| <i>Coquillettidia richiardii</i>             | 379,513    | 57.8820           |
| <i>Anopheles hyrcanus</i>                    | 162,725    | 24.8182           |
| <i>Anopheles maculipennis</i> s.l.           | 28,363     | 4.3258            |
| <i>Aedes caspius</i>                         | 25,767     | 3.9299            |
| <i>Culex pipiens</i> s.l./ <i>torrentium</i> | 23,134     | 3.5283            |
| <i>Aedes vexans</i>                          | 16,673     | 2.5429            |
| <i>Culex modestus</i>                        | 15,135     | 2.3083            |
| <i>Anopheles algeriensis</i>                 | 2,280      | 0.3477            |
| unidentified                                 | 1,041      | 0.1588            |
| <i>Aedes flavescens</i>                      | 529        | 0.0807            |
| <i>Aedes detritus</i>                        | 246        | 0.0375            |
| <i>Aedes</i> spec.                           | 169        | 0.0258            |
| <i>Aedes cinereus</i>                        | 51         | 0.0078            |
| <i>Culex</i> spec.                           | 17         | 0.0026            |
| <i>Culiseta annulata</i>                     | 12         | 0.0018            |
| <i>Aedes hungaricus</i>                      | 4          | 0.0006            |
| <i>Anopheles</i> spec.                       | 3          | 0.0005            |
| <i>Uranotaenia unguiculata</i>               | 3          | 0.0005            |
| <i>Aedes geniculatus</i>                     | 1          | 0.0002            |
| <i>Aedes sticticus</i>                       | 1          | 0.0002            |
