# Supplementary material for: Ecology of West Nile Virus in the Danube Delta, Romania: Phylogeography, Xenosurveillance and Mosquito Host-Feeding Patterns
Source: MDPI journal article supplement (doi:10.3390/v11121159), 2019-12-14
Supplement: s1 [file s1]

**Table S2.** Samples of blood-fed mosquito species positive for West Nile virus-specific IgG antibodies with information on the host species, mosquito species, sampling year collected at four sampling sites in the DDBR, Romania (2014-2016).

| Host-species | Mosquito species                   | Year | Dunărea Veche | Lake Roşuleţ | Letea | Sulina         | Sum |
|--------------|------------------------------------|------|---------------|--------------|-------|----------------|-----|
| horse        | <i>Aedes vexans</i>                | 2016 |               | 1            |       |                | 1   |
|              | <i>Anopheles hyrcanus</i>          | 2016 |               | 3            |       |                | 3   |
|              | <i>Anopheles maculipennis</i> s.l. | 2015 |               |              | 1     | 1              | 2   |
|              | <i>Coquillettidia richiardii</i>   | 2015 |               |              | 3     | 1              | 4   |
|              |                                    | 2016 | 1             | 1            |       |                | 2   |
| dog          | <i>Aedes caspius</i>               | 2016 | 1             |              |       |                | 1   |
|              | <i>Anopheles hyrcanus</i>          | 2014 |               |              | 1     |                | 1   |
|              |                                    | 2016 |               | 1            |       | 1 <sup>1</sup> | 2   |
|              | <i>Anopheles maculipennis</i> s.l. | 2014 |               | 1            |       |                | 1   |
|              | <i>Coquillettidia richiardii</i>   | 2014 |               |              |       | 1              | 1   |
|              |                                    | 2015 |               | 1            |       |                | 1   |
|              | Sum                                |      | 2             | 8            | 5     | 4              | 19  |

<sup>1</sup>also positive for USUV-specific IgG
