# Supplementary material for: Ecology of West Nile Virus in the Danube Delta, Romania: Phylogeography, Xenosurveillance and Mosquito Host-Feeding Patterns
Source: MDPI journal article supplement (doi:10.3390/v11121159), 2019-12-14
Supplement: s1 [file s1]

**Table S3.** Frequency and percentage (in brackets) of detected host taxa for the six less abundant species.

|                                       | <i>Anopheles<br/>algeriensis</i> | <i>Culex<br/>modestus</i> | <i>Aedes<br/>flavescens</i> | <i>Aedes<br/>detritus</i> | <i>Aedes<br/>cinereus</i> | <i>Uranotaenia<br/>unguiculata</i> |
|---------------------------------------|----------------------------------|---------------------------|-----------------------------|---------------------------|---------------------------|------------------------------------|
| <i>Homo sapiens</i>                   | 9 (50)                           | 3 (37.5)                  | 2 (33.3)                    |                           |                           | 1 (100)                            |
| <i>Bos taurus</i>                     | 5 (27.8)                         | 1 (12.5)                  |                             | 4 (80)                    | 1 (33.3)                  |                                    |
| <i>Canis lupus</i>                    |                                  | 1 (12.5)                  |                             |                           |                           |                                    |
| <i>Equus caballus</i>                 | 2 (11.1)                         |                           |                             | 1 (20)                    | 2 (66.7)                  |                                    |
| <i>Felis catus</i>                    | 2 (11.1)                         |                           |                             |                           |                           |                                    |
| <i>Rattus norvegicus</i>              |                                  | 2 (25)                    |                             |                           |                           |                                    |
| <i>Sus scrofa</i>                     |                                  | 1 (12.5)                  | 4 (66.7)                    |                           |                           |                                    |
| blood-fed specimens                   | 29 (0.8)                         | 36 (0.9)                  | 7 (0.2)                     | 6 (0.2)                   | 3 (0.1)                   | 1 (<0.1)                           |
| successful analysed specimens         | 18                               | 8                         | 6                           | 5                         | 3                         | 1                                  |
| identified hosts per mosquito species | 18                               | 8                         | 6                           | 5                         | 3                         | 1                                  |
| identified host taxa                  | 4                                | 5                         | 2                           | 2                         | 2                         | 1                                  |
